# Supplementary material for: Salivary Biomarkers for Parkinson’s Disease: A Systematic Review with Meta-Analysis
Source: MDPI journal article supplement (doi:10.3390/cells13040340), 2024-02-14
Supplement: s1 [file s1]

**Table S1.** The detailed characteristics of included studies.

| Study                         | Inclusion Criteria                                                                                                                                                                                                 | Exclusion Criteria                                                                                                                                                                                                                                                                                                                                                | Smoking Status                                       |
|-------------------------------|--------------------------------------------------------------------------------------------------------------------------------------------------------------------------------------------------------------------|-------------------------------------------------------------------------------------------------------------------------------------------------------------------------------------------------------------------------------------------------------------------------------------------------------------------------------------------------------------------|------------------------------------------------------|
| Al-Nimer et al., 2014         | PD: PD (primary, familial, and sporadic), different duration of illness, treated with dopamine agonists and/or anticholinergic agents, aged 40-75 years                                                            | HC: severely debilitated, aged more than 80 or less than 15 years                                                                                                                                                                                                                                                                                                 | current smokers: 4 PD, 10 HC; ex-smokers: 3 PD, 4 HC |
| Angius et al., 2023           | NR                                                                                                                                                                                                                 | PD: atypical parkinsonism, dementia, psychiatric conditions interfering with study participation; HC: history of any neurodegenerative disorder                                                                                                                                                                                                                   | NR                                                   |
| Cao et al., 2019              | PD: PD diagnosis according to the United Kingdom Parkinson’s Disease Society Brain Bank criteria                                                                                                                   | all: cardiovascular, cerebrovascular, autoimmune diseases, hematological neoplasms and tumors                                                                                                                                                                                                                                                                     | NR                                                   |
| Chahine et al., 2020          | PD: clinical diagnosis of PD, presence of bradykinesia with either rest tremor or rigidity; decreased dopamine transporter (DAT) binding on SPECT, age $\geq 40$ years, any stage of disease; HC: normal DAT SPECT | all: clinical diagnosis of dementia, comorbid medical conditions precluding specimen acquisition                                                                                                                                                                                                                                                                  | NR                                                   |
| Cressatti et al., 2020        | PD: idiopathic PD diagnosis according to the United Kingdom Parkinson’s Disease Society Brain Bank criteria                                                                                                        | all: cigarette smoking within the past year, history of oral cancer, severe periodontal disease, active systemic inflammatory disease, current alcoholism, illicit drug abuse, recent exposure to neuroleptic medications, atypical, secondary, or familial parkinsonism                                                                                          | non-smokers                                          |
| De Bartolo et al., 2023       | PD: PD diagnosis according to Vivacqua et al. and Ohtomo et al. criteria for less than 2 years                                                                                                                     | PD: other neurological or psychiatric conditions, H&Y stage III, IV, V; dopaminergic treatment; HC: neurological or psychiatric disorders, drugs inducing parkinsonism, related to a parkinsonian patient; all: cardiovascular diseases, diabetes mellitus, chronic inflammatory diseases, neoplasms, autoimmune diseases, salivary gland/oral cavity pathologies | NR                                                   |
| Fernández-Espejo et al., 2021 | PD: PD diagnosis according to MDS criteria, a reliable loss of dopamine-transporter binding signal on basal ganglia (evaluated with DAT-SPECT), aged 45-75 years on onset, PD diagnosis for at least 3 years       | PD: atypical deficits, relatives with PD; HC: first-degree family member with a neurological disorder; all: liver, renal, hematological, cardiovascular dysfunctions, AIDS, autoimmune diseases, cancer, alcoholism, smoking, coffee drinking                                                                                                                     | non-smokers                                          |
| Goldman et al., 2018          | PD: PD diagnosis according to the United Kingdom Parkinson’s Disease Society Brain Bank criteria, moderate-advanced                                                                                                | all: atypical, secondary parkinsonian syndromes, Deep Brain Stimulation, ablative brain surgery, cancer (except basal or                                                                                                                                                                                                                                          | NR                                                   |

Nijakowski et al. „Salivary biomarkers for Parkinson’s Disease: a systematic review with meta-analysis” – Supplementary materials

|                             |                                                                                                                                                                                                                                                                         |                                                                                                                                                                                                                              |                                                                |
|-----------------------------|-------------------------------------------------------------------------------------------------------------------------------------------------------------------------------------------------------------------------------------------------------------------------|------------------------------------------------------------------------------------------------------------------------------------------------------------------------------------------------------------------------------|----------------------------------------------------------------|
|                             | stage, disease duration at least 4 years, onset at 50-75 years, bradykinesia, rigidity, resting tremor, well-established response to dopaminergic agents, amantadine                                                                                                    | squamous cell skin cancers) within preceding 5 years, autoimmune, liver, hematological disorders, conditions precluding lumbar puncture; HC: neurological disorders, MoCA less than 26, first-degree family member with PD   |                                                                |
| Rastogi et al., 2023        | PD: clinical definite diagnosis of PD                                                                                                                                                                                                                                   | NR                                                                                                                                                                                                                           | NR                                                             |
| Sabaei et al., 2023         | PD: PD diagnosis according to MDS 2015 criteria, PD: MMSE score $\geq 26$ , H&Y stage I or II; HC: MMSE score equal to or more than 26, no history of neurological diseases; AD: AD diagnosis according to the NIA-AA criteria, no other diseases that affect cognition | AD, PD: drugs other than medications for treating the underlying neurological disease; all: history of vascular dementia, head injury, stroke, liver or kidney failure, other dementias                                      | NR                                                             |
| Shaheen et al., 2020        | PD: idiopathic PD diagnosis according to the United Kingdom Parkinson’s Disease Society Brain Bank criteria                                                                                                                                                             | all: cardiovascular, cerebrovascular, autoimmune, chronic inflammatory diseases, diabetes mellitus, hematological neoplasms, salivary gland, oral cavity pathologies                                                         | NR                                                             |
| Kang et al., 2016           | PD: PD diagnosis according to the United Kingdom Parkinson’s Disease Society Brain Bank criteria                                                                                                                                                                        | PD: functional neurosurgery for PD                                                                                                                                                                                           | NR                                                             |
| Vivacqua et al., 2016       | PD: PD diagnosis based on Queen Square Brain Bank criteria, MoCA score higher than 18, FAB score higher than 12                                                                                                                                                         | PD: atypical, secondary parkinsonisms; all: cardiovascular, cerebrovascular, autoimmune, chronic inflammatory diseases, hematological neoplasms, diabetes mellitus, solid tumors, salivary gland and oral cavity pathologies | NR                                                             |
| Vivacqua et al., 2019       | PD: PD diagnosis based on Queen Square Brain Bank criteria                                                                                                                                                                                                              | all: cardiovascular, cerebrovascular, autoimmune, chronic systemic diseases, hematological and solid neoplasms, salivary gland and oral cavity pathologies, MoCA score lower than 18, FAB score lower than 12                | NR                                                             |
| Bermejo-Pareja et al., 2010 | PD: PD diagnosis according to Gelb et al. and Calne et al. diagnostic criteria; AD: AD diagnosis according to the DSM-IV or NINCDS-ADRDA criteria; HC: completely normal cognitive and functional level                                                                 | AD: vascular dementia                                                                                                                                                                                                        | NR                                                             |
| Lau et al., 2015            | PD: PD diagnosis; AD: AD diagnosis; HC: at least 50 years of age, good general health; series of clinical and neuropsychological                                                                                                                                        | HC: history of neurological, psychiatric, major medical diagnosis that could contribute significantly to cognitive impairment or dementia                                                                                    | PD: 2 smokers, 4 ex-smokers; AD: 3 smokers, 1 ex-smoker; HC: 3 |

Nijakowski et al. „Salivary biomarkers for Parkinson’s Disease: a systematic review with meta-analysis” – Supplementary materials

|                               | examinations by physicians and neuropsychologists defined participants’ inclusion to appropriate groups                                                                                                                                                                                                         |                                                                                                                                                                                                                                                                                                                                                                                           | smokers, 1 ex-smoker |
|-------------------------------|-----------------------------------------------------------------------------------------------------------------------------------------------------------------------------------------------------------------------------------------------------------------------------------------------------------------|-------------------------------------------------------------------------------------------------------------------------------------------------------------------------------------------------------------------------------------------------------------------------------------------------------------------------------------------------------------------------------------------|----------------------|
| Carro et al., 2017            | PD: PD diagnosis according to Gelb et al. and Calne et al. diagnostic criteria; HC: CDR scale = 0, MMSE score = 29 (0.8), normal yields in cognitive tests of memory, language, executive functions; AD: AD diagnosis according to the NINCDS-ADRDA criteria; MCI: MCI diagnosis based on the Petersen criteria | HC: psychiatric, systemic or neurological disorders that can affect cognition or limit participation in the study, visual, auditory, language limitations                                                                                                                                                                                                                                 | NR                   |
| Costa et al., 2019            | PD: PD diagnosis for at least 2 years, H&Y score greater than or equal to 1.5, no regular physical activity (twice a week or more), age 60 years or more, pharmacological stability (unchanged drug prescription for at least 3 months), use of levodopa, completion of the TCLE                                | PD: polyneuropathy, other neurodegenerative pathology, autoimmune diseases, cognitive deficit incompatible with study participation, glucocorticoids, corticosteroids, insulin, antiepileptic drugs, drugs for dementia used 2 weeks prior to data collection, active malignancy, history of neurosurgical procedure; HC: regular physical activity, corticosteroids, any ongoing disease | NR                   |
| Fedorova et al., 2015         | PD: PD diagnosis according to the United Kingdom Parkinson’s Disease Society Brain Bank criteria                                                                                                                                                                                                                | PD: serious medical conditions (severe disorders of the heart, lungs, liver, and kidneys), neurological disorders, diseases affecting the autonomic function or the salivary glands, cancer or radiation therapy of the head and neck, drugs that may affect the function of AChE                                                                                                         | NR                   |
| Fernández-Espejo et al., 2022 | PD: PD diagnosis according to MDS criteria, a reliable loss of dopamine-transporter binding signal on basal ganglia (evaluated with DAT-SPECT), aged 45-75 years on onset                                                                                                                                       | PD: atypical deficits, Deep Brain Stimulation, first-degree relatives with PD; HC: first-degree family member with a neurological disorder; all: liver, renal, hematological, cardiovascular dysfunctions, malabsorption, morbid obesity, acquired immunodeficiency syndrome, autoimmune diseases, cancer, infectious conditions, alcoholism, smoking, coffee drinking                    | non-smokers          |
| Galindez et al., 2021         | PD: idiopathic PD diagnosis according to the United Kingdom Parkinson’s Disease Society Brain Bank criteria; other participants: based on their neurological status                                                                                                                                             | all: cigarette smoking within the past year, active systemic inflammatory disease, history of oral cancer, current alcoholism or drug abuse, atypical or familial parkinsonism                                                                                                                                                                                                            | non-smokers          |
| Song et al., 2018             | PD: idiopathic PD diagnosis according to the United                                                                                                                                                                                                                                                             | all: atypical or secondary parkinsonism, smoking, severe                                                                                                                                                                                                                                                                                                                                  | non-smokers          |

Nijakowski et al. „Salivary biomarkers for Parkinson’s Disease: a systematic review with meta-analysis” – Supplementary materials

|                      | Kingdom Parkinson’s Disease Society Brain Bank criteria                                                                 | periodontal disease, active systemic inflammatory diseases, oral cancer, HC: history of a neurological disorder                                                                                                                                                                                                                                                                                  |                                                              |
|----------------------|-------------------------------------------------------------------------------------------------------------------------|--------------------------------------------------------------------------------------------------------------------------------------------------------------------------------------------------------------------------------------------------------------------------------------------------------------------------------------------------------------------------------------------------|--------------------------------------------------------------|
| Kang et al., 2014    | PD: PD diagnosis according to the United Kingdom Parkinson’s Disease Society Brain Bank criteria                        | all: moderate, heavy cigarette smoking (more than 10 packs/year), alcohol use, psychotherapeutic drugs; HC: history, signs, symptoms of Parkinson-plus syndrome, cognitive impairment, other neurological diseases                                                                                                                                                                               | smoking ≤10 packs/year                                       |
| Masters et al., 2015 | PD: PD diagnosis based on Queen Square Brain Bank criteria                                                              | HC: dopaminergic medication                                                                                                                                                                                                                                                                                                                                                                      | NR                                                           |
| Contini et al., 2023 | PD: PD diagnosis according to MDS 2015 criteria; AD: AD diagnosis according to the NIA-AA criteria                      | all: major oral disease (periodontitis, caries, dry mouth), history of radiotherapy, chemotherapy, antidepressants, anticholinergic drugs; PD: secondary parkinsonism, atypical Parkinsonian disorders, dementia, psychiatric conditions interfering with study participation, chronic/acute rhinosinusitis, any systemic disease with smell disorders, chronic renal failure, thyroid disorders | NR                                                           |
| Figura et al., 2021  | PD: PD diagnosis according to the United Kingdom Parkinson’s Disease Society Brain Bank criteria                        | all: smoking, previous injection of botulinum toxin to salivary glands, anticholinergic medications, other neurodegenerative diseases than PD, malignancies, periodontitis, active inflammation, oral cancer history; HC: clinical evidence of neurodegeneration                                                                                                                                 | non-smokers                                                  |
| Kumari et al., 2020  | PD: idiopathic PD diagnosis according to the United Kingdom Parkinson’s Disease Society Brain Bank criteria             | PD: secondary Parkinsonism, other neurological disorder, diabetes, hypertension; HC: neurological, psychiatric problems, diabetes, hypertension                                                                                                                                                                                                                                                  | PD: 7 smokers, 69 non-smokers; HC: 3 smokers, 31 non-smokers |
| Chen et al., 2020    | PD: PD diagnosis based on Chinese diagnostic criteria for PD (2016)                                                     | all: diseases affecting the secretion of saliva, connective tissue diseases, severe diseases of the heart or lungs, tumor lesions, hemorrhagic wounds in the mouth, neuropsychiatric disorders, intolerance to saliva collection                                                                                                                                                                 | NR                                                           |
| Jiang et al., 2021   | PD: idiopathic PD diagnosis according to MDS 2015 criteria; other disorders diagnosed according to appropriate criteria | all: severe periodontal disease, oral cancer, gastroenteric tumor, active systemic inflammatory diseases, serious organic diseases of heart, liver, kidney, drug, alcoholic abuse in the past year                                                                                                                                                                                               | NR                                                           |

Nijakowski et al. „Salivary biomarkers for Parkinson’s Disease: a systematic review with meta-analysis” – Supplementary materials

|                     |                                                                                                                                                              |    |                              |
|---------------------|--------------------------------------------------------------------------------------------------------------------------------------------------------------|----|------------------------------|
| Chuang et al., 2017 | PD: PD diagnosis according to UK Brain Bank and Gelb et al. diagnostic criteria for diagnosing idiopathic PD; HC: according to previously described criteria | NR | 116 smokers, 143 non-smokers |
|---------------------|--------------------------------------------------------------------------------------------------------------------------------------------------------------|----|------------------------------|

Legend: AChE, acetylcholinesterase; AD, Alzheimer’s Disease; CDR, Clinical Dementia Rating; DSM, Diagnostic and Statistical Manual of Mental Disorders; FAB, Frontal Assessment Battery; HC, healthy control; H&Y, Hoehn and Yahr; MCI, Mild Cognitive Impairment; MDS, Myelodysplastic Syndromes; MMSE, Mini-Mental State Examination; MoCA, Montreal Cognitive Assessment; NIA-AA, National Institute on Aging and Alzheimer’s Association; NINCDS-ADRDA, National Institute of Neurological and Communicative Disorders and Stroke and the Alzheimer’s Disease and Related Disorders Association; NR, not reported; PD, Parkinson’s Disease; SPECT, single photon emission computed tomography; TCLE, Total Clinical Load of Epilepsy; UK, United Kingdom.
